# Supplementary material
Source: PubMed Central journal article supplement (PMC3390886)
Supplement: 1204026109_pnas.201204026SI.pdf [file 1204026109_pnas.201204026SI.pdf]

# Supporting Information

## Clapham and Karr 10.1073/pnas.1204026109

### SI Text

**Insect Size Database.** The database consists of more than 10,500 measured insect specimens, ranging in age from Serpukhovian (latest Mississippian, Namurian A) to latest Miocene. Modern insects were not included because the extant fauna is known considerably better than any fossil assemblage. All specimens were preserved as compression fossils; amber preservation was not included because of the strong temporal bias (only post-Jurassic) and bias toward small size. The largest insect from each 10-Myr bin is listed in Table S1. Bins with fewer than 50 specimens (70, 80, 210, and 220 Ma) were excluded from analyses.

The age of each insect locality was resolved to the finest possible stratigraphic level. Some localities could be dated precisely by radiometric dating of co-occurring volcanic units, particularly for Cenozoic volcanic maar lakes or volcanic-dammed lakes, such as Florissant, or through marine ammonite biostratigraphy in many Jurassic localities from Europe. Others, such as Mesozoic nonmarine localities in central Asia (e.g., Madygen, Shurab, and Karatau), are less finely resolved and were assigned to the midpoint of published age determinations. Localities were then assigned to 10-Myr-long bins (e.g., 145–155 Ma) for correlation with published atmospheric environmental oxygen concentration ( $pO_2$ ) (1, 2) proxy records.

There is some uncertainty inherent in comparing the three records, each of which were obtained independently and based on slightly different timescales. The largest bias is during the Triassic because of the drastic lengthening of the Norian (3); we use a 228-Ma age for the Carnian-Norian boundary instead of 216.5 Ma in the timescale used in the GEOCARBSULF model (2). The result of this is to offset the maximum insect size about 10 Myr earlier than the oxygen peak.

The length of the wing, tegmen (Orthoptera and relatives, Blattodea and relatives, some Hemiptera), elytron (Coleoptera), or hemelytron (some Hemiptera) was recorded, along with the wing width and, if preserved, body length and body width. In groups with two pairs of wings (fore and hind wings), the larger of the two pairs was used. Sizes were taken from measurements directly reported in the systematic description or were measured from published illustrations if no size was given in the text. Many fossil wings are incomplete because of taphonomic degradation following the death of the insect, especially in the largest insects. Estimates of the original wing length were taken from the published description when provided, or extrapolated by us using wing length:width ratios from related taxa. All but one (undescribed Odonata IGM 8826) of the largest recorded insects from each time interval were either complete or had an estimated length provided by the taxon's author.

**Allometric Scaling of Body Width and Volume.** Because the distance over which oxygen must be transported is the key constraint, body radius, not wing length, is the physiologically relevant dimension. Wing length is a reasonable proxy for body size because it is highly correlated to body length ( $r = 0.905$ ,  $P < <0.001$ ) and body width ( $r = 0.64$ ,  $P < <0.001$ ). Although wing length is less precise than more physiologically relevant measurements, like body size, it is also less subject to distortion during compression and fossilization. Furthermore, body length and width are less commonly preserved, particularly in Paleozoic and Triassic fossils, which are predominantly isolated wings. We used allometric scaling equations calculated from complete fossil specimens to estimate body width (Fig. S1) and body volume (Fig. S2) for the majority of specimens preserved only as isolated wings. This approach

only works on groups that have an approximately cylindrical body geometry, as the dorso-ventral thickness of the body cannot be measured or estimated from 2D compression fossils. Nevertheless, there is a consistent decrease from larger width for a given wing length (Orthoptera) to narrower body width (Neuroptera), reminiscent of the insect physiognomy categories of Wheeler (4).

**Sample Size Effects.** Because the largest insects are uncommon, the fact that our dataset contains substantially more data in some Permo-Carboniferous bins than in many Meso-Cenozoic intervals could bias the record toward larger size. The presence of very large insects, larger than any Jurassic-Recent taxa, in the moderately or sparsely sampled 320-, 310-, and 290-Ma bins implies that observed size trends are solely an artifact of sample size variation. Potential effects of sample size differences were assessed in two ways: first, by randomly subsampling each bin at a quota of 100 specimens to achieve uniform sampling; and second, by randomly subsampling the same size distribution at the actual levels of each interval.

The uniform subsampling test was repeated 1,000 times for each 10-Myr bin and the mean size of the largest wing was calculated from the 1,000 trials. The subsampled sizes are substantially smaller than the raw data in the Paleozoic and Triassic, slightly smaller in the Jurassic, and virtually unchanged in the Cenozoic (Fig. S4). This pattern is partially the result of greater sampling in some Permo-Carboniferous bins but results more from the sparse number of very large insects. In the Cenozoic, many insects are close to the maximum size limit; in contrast, the largest Permo-Carboniferous wings are often 20–80 mm larger than the next biggest specimen.

Although uniform subsampling indicates that sample size effects do not bias the pattern, imposing a uniform quota exaggerates their impact and is not the most appropriate technique because it assumes that the original sampling was random. Our sampling was targeted to document the largest insects, not to achieve random coverage of all insect sizes, so is focused on large-bodied groups, such as Odonatoptera, Panorthoptera, and Neuroptera. Cenozoic bins could contain substantially more taxa by including more of the extremely diverse record of small-bodied Diptera, Hemiptera, Coleoptera, and Hymenoptera. Heavily sampled bins therefore reflect increased reporting of small- to medium-sized taxa, not more intense sampling overall, and the targeted sampling of the raw record is a closer approximation of true size trends than expected from simple random sampling of all insect fossils.

The size distribution of insect wing lengths is a broadly log-normal distribution, although truncated at small sizes because of intrinsic size limitations and taphonomic or collecting bias against the smallest taxa (<5 mm). We used maximum-likelihood estimation to calculate the mean and SD of the size-frequency distribution that best fit nearly 1,500 insect sizes in the 270- and 280-Ma bins, two of the most completely sampled intervals (Fig. S5). Fossil size data are not perfectly described by a log-normal distribution because the right tail, encompassing large insects, is relatively heavy, a pattern common among many animal groups (5). As such, random samples from this distribution will, on average, underestimate the actual maximum-recorded insect size. Nevertheless, comparison of relative differences in the maximum sizes subsampled from a single distribution with the observed pattern of maximum sizes can indicate whether observed maximum sizes reflect different levels of sampling of the same distribution.

Because actual size distributions are heavy-tailed compared with a log-normal distribution, the subsampled sizes underestimate the expected size at a given sampling quorum. Regardless, the pronounced changes in recorded size are substantially larger than the relatively flat results expected from subsampling the same distribution at different levels (Fig. S6). In particular, the largest Cenozoic insects are much smaller than expected from random sampling the same distribution that yielded giant Paleozoic insects.

**Maximum-Likelihood Model Fitting.** Models describing trends in wing length were fit using maximum-likelihood estimation using the package *bbmle* (6) in the statistical programming environment R (7). Maximum-likelihood methods simultaneously estimate the best-fit parameters of each model and compare multiple models using the bias-corrected Akaike information criterion (AICc) (8). The AICc value quantifies the degree of support for each model by balancing the goodness-of-fit (log-likelihood) against model complexity (the number of parameters), with the smallest value indicating the best fit. Values are reported here as  $\Delta\text{AICc}$ , the difference between each model and the best-supported model. The AICc values can be converted into Akaike weights, which sum to one and indicate the relative degree of support for each model.

Three basic models were compared. Model 1 (“oxygen”) explains wing length as a function of atmospheric  $p\text{O}_2$  throughout the entire history of insects, fitting the best slope and intercept to the wing length:oxygen relationship. Model 2 (“oxygen/140 Ma break”) fits the best slope and intercept only for the Carboniferous-Jurassic (320- to 140-Ma bins) and holds the slope constant at zero and fits the intercept for the Cretaceous-Recent.

This model enforces size stasis but allows a best-fit estimate of the wing length during that interval. Model 3 (“oxygen/140 Ma/90 Ma breaks”) fits slope and intercept for the Carboniferous-Jurassic (320- to 140-Ma bins) and enforces size stasis (slope = 0) but with different best-fit sizes (intercepts) for the Cretaceous and Cenozoic. Model 4 (“oxygen/200 Ma/140 Ma/90 Ma breaks”) adds an additional break between 230 and 200 Ma (Late Triassic) and allows the intercept to vary with constant zero slope for the Jurassic, Cretaceous, and Cenozoic separately. These four basic models were supplemented by four others (models 1a, 2a, 3a, and 4a) that use the same conditions but make use of multiple regression with a separate best-fit slope and intercept for the wing length:paleolatitude relationship (using the absolute value of paleolatitude). The best-fit paleolatitude slope and intercept is applied to the entire Carboniferous-Recent dataset.

Model inputs included wing length, estimated body volume, or estimated body width, compared against paleo- $p\text{O}_2$  proxies from the GEOCARBSULF model (2) and the COPSE model (1) (although data-model comparison using COPSE model output, particularly in the early Mesozoic, implies that it is less reliable than GEOCARBSULF output). The additional results for body width, body volume, and using the COPSE  $p\text{O}_2$  model are presented in Table S4. None of the six data-model combinations was best explained by oxygen over the entire history of insects and all identified the Early Cretaceous (140 Ma) as an important break in the history of insect size. An additional breakpoint at 230–200 Ma was supported by the COPSE models and by body volume, potentially indicating the importance of pterosaurs as flying vertebrate competitors or predatory.

- Bergman N, Lenton T, Watson A (2004) COPSE: A new model of biogeochemical cycling over Phanerozoic time. *Am J Sci* 304:397–437.
- Berner R (2009) Phanerozoic atmospheric oxygen: New results using the GEOCARBSULF model. *Am J Sci* 309:603–606.
- Furin S, et al. (2006) High-precision U-Pb zircon age from the Triassic of Italy: Implications for the Triassic time scale and the Carnian origin of calcareous nannoplankton and dinosaurs. *Geology* 34:1009–1012.
- Wheeler WM (1927) The physiognomy of insects. *Q Rev Biol* 2:1–36.
- Clauset A, Erwin DH (2008) The evolution and distribution of species body size. *Science* 321:399–401.
- Bolker B (2010) *bbmle*: Tools for general maximum likelihood estimation. *R package version 0.9.5.1*.
- R Development Core Team (2010) *R: A language and environment for statistical computing* (R Foundation for Statistical Computing, Vienna, Austria).
- Burnham KP, Anderson DR (2002) *Model Selection and Multimodel Inference: A Practical Information Theoretic Approach* (Springer, New York), p 496.

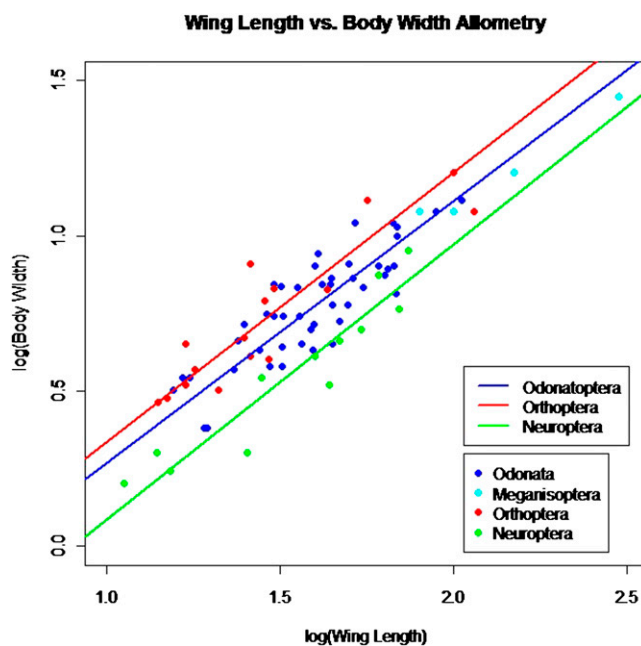

**Fig. S1.** Allometric scaling of body width and wing length for Odonoptera, Orthoptera, and Neuroptera. Best-fit major axis regression lines for each group are: Odonoptera:  $\log(\text{body width}) = 0.898\log(\text{wing length}) - 0.661$ ; Orthoptera:  $\log(\text{body width}) = 0.953\log(\text{wing length}) - 0.642$ ; and Neuroptera:  $\log(\text{body width}) = 0.889\log(\text{wing length}) - 0.805$ . All equations use base 10 logarithms.





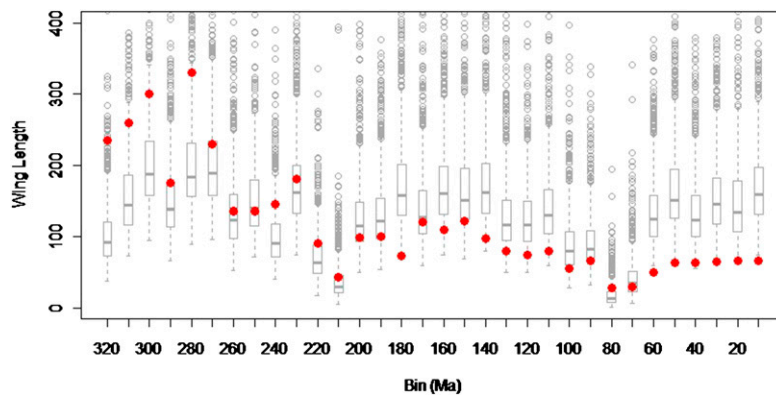

Fig. S6. Box-and-whisker plot showing maximum wing length recorded in 1,000 trials, with each trial sampling the same number of specimens from a constant log-normal distribution (on a log scale, mean = 1.1017, SD = 0.3776). Red dots show maximum recorded size from each time bin.

Table S1. Largest insect in each 10-Myr bin

| Bin | Oxygen | COPSE | <i>n</i> | Species name                              | Order         | Length (mm) | Paleolat | Locality name             | Age                  | Ref. |
|-----|--------|-------|----------|-------------------------------------------|---------------|-------------|----------|---------------------------|----------------------|------|
| 10  | 21.6   | 1.15  | 394      | <i>Mediaeschna lucida</i>                 | Odonata       | 66.7        | 36.3     | Shanwang, Shandong        | Middle Miocene       | (1)  |
| 20  | 22.6   | 1.27  | 253      | <i>Merlax bohemicus</i>                   | Odonata       | 66.5        | 50.5     | Bilina mine               | Early Miocene        | (2)  |
| 30  | 22.7   | 1.38  | 614      | " <i>Orthacanthacris</i> " <i>lineata</i> | Orthoptera    | 65          | 43.6     | Celas Gard                | Early Oligocene      | (3)  |
| 40  | 22.1   | 1.45  | 222      | <i>Triaeschna gossi</i>                   | Odonata       | 64          | 48.5     | Bagshot beds, Bournemouth | Late Eocene          | (4)  |
| 50  | 21.4   | 1.46  | 458      | <i>Pseudotettigonia amoena</i>            | Orthoptera    | 63          | 52.7     | Jutland                   | Early Eocene         | (5)  |
| 60  | 21.5   | 1.45  | 197      | <i>Arctolocusta groenlandica</i>          | Orthoptera    | 53          | 62.3     | Atanekrdluk, Greenland    | Middle Paleocene     | (6)  |
| 70  | 21.7   | 1.48  | 5        | Odonata IGM 8826                          | Odonata       | 29          | 32.4     | Saltillo, Coahuila        | Late Campanian       | (7)  |
| 80  | 21.9   | 1.51  | 1        | <i>Stantoniella cretacea</i>              | Blattodea     | 28          | 54.4     | Willow Creek              | Campanian            | (8)  |
| 90  | 21.7   | 1.54  | 51       | <i>Paraliupanshania torvaldsi</i>         | Odonata       | 66.6        | 43.8     | Kzyl-Zhar                 | Turonian             | (9)  |
| 100 | 21.5   | 1.55  | 54       | <i>Ptiloteuthis foliatus</i>              | Blattodea     | 79          | 41.5     | Cottonwood Creek          | Cenomanian           | (10) |
| 110 | 20.8   | 1.49  | 265      | <i>Colossocossus giganticus</i>           | Hemiptera     | 80          | -7.5     | Ararape Basin, Crato      | L. Aptian-E. Albian  | (11) |
| 120 | 18.8   | 1.39  | 348      | <i>Sinaeschnidia cancellosa</i>           | Odonata       | 75          | 44.2     | Liaoning Province         | Barremian-E. Aptian  | (12) |
| 130 | 16     | 1.26  | 282      | <i>Gigantoeschnidium ibericus</i>         | Odonata       | 80          | 29.7     | Las Hoyas                 | Late Barremian       | (12) |
| 140 | 14.5   | 1.21  | 565      | <i>Prohoyaeschna milleri</i>              | Odonata       | 97          | 41.5     | Durlston Bay, Swanage     | Late Berriasian      | (9)  |
| 150 | 15.7   | 1.23  | 386      | <i>Kalligramma haeckeli</i>               | Neuroptera    | 122         | 40.2     | Solnhofen                 | Tithonian            | (13) |
| 160 | 15.3   | 1.21  | 582      | <i>Cymatophlebia suevica</i>              | Odonata       | 110         | 39.3     | Schalksburg-Schule        | Topmost Oxfordian    | (9)  |
| 170 | 14.5   | 1.15  | 361      | <i>Hemerobioides giganteus</i>            | Odonata       | 120         | 42.4     | Stonesfield               | Bathonian            | (14) |
| 180 | 14     | 1.12  | 847      | <i>Campterochlebia elegans</i>            | Odonata       | 73.1        | 41.5     | Schandelah, Braunschweig  | Toarcian             | (15) |
| 190 | 14.8   | 1.07  | 256      | <i>Pteropteron mirabile</i>               | Odonata       | 94          | 42.1     | Shurab 3, Sai-Sagul       | Pliensbachian        | (16) |
| 200 | 19     | 1.05  | 152      | <i>Sogdophlebia singularis</i>            | Odonata       | 98.5        | 49.7     | Shurab (Middle area)      | Rhaetian             | (16) |
| 210 | 22.5   | 1.04  | 26       | <i>Italomyrmeleon bergomensis</i>         | Stem-Odonata  | 42.4        | 32.6     | Ponte Giurino village     | Late Norian-Rhaetian | (17) |
| 220 | 22.6   | 1.02  | 21       | <i>Triadotypus nana</i>                   | Stem-Odonata  | 90.7        | 8.5      | Dent de Villard, Vanoise  | Carnian-Norian       | (18) |
| 230 | 19.6   | 1.02  | 554      | <i>Gigatitan similis</i>                  | Titanoptera   | 180         | 36.5     | Madygen                   | Ladinian-Carnian     | (19) |
| 240 | 19.2   | 1.08  | 183      | <i>Clathrotitan scullyi</i>               | Titanoptera   | 145         | -61.2    | Beacon Hill               | Anisian              | (20) |
| 250 | 24     | 1.17  | 354      | <i>Triadotypus guillaumei</i>             | Stem-Odonata  | 136         | 14.4     | Bust, Grès a Volzia       | Early Anisian        | (21) |
| 260 | 31     | 1.14  | 184      | <i>Kargalotypus kargalensis</i>           | Stem-Odonata  | 135         | 29.2     | Kargala                   | L. Word-E. Capitan   | (22) |
| 270 | 32.2   | 1.15  | 761      | <i>Arctotypus sp. A</i>                   | Meganisoptera | 230         | 6.9      | Lodève Basin F36          | Roadian-Wordian      | (23) |
| 280 | 32.7   | 1.26  | 864      | <i>Meganeuropsis permiana</i>             | Meganisoptera | 330         | 5.4      | Elmo                      | Late Artinskian      | (24) |
| 290 | 32.4   | 1.39  | 254      | Obora Specimen (large)                    | Meganisoptera | 175         | 10.4     | Obora                     | Sakmarian            | (25) |
| 300 | 30.4   | 1.33  | 764      | <i>Meganeura monyi</i>                    | Meganisoptera | 300         | -1.9     | Commentry                 | Stephanian B-C       | (26) |
| 310 | 26.2   | 1.29  | 419      | <i>Bohemiatypus elegans</i>               | Meganisoptera | 260         | 3.9      | Otvovice                  | Westphalian C        | (27) |
| 320 | 21.4   | 1.26  | 97       | <i>Shenzhousia qilianshanensis</i>        | Meganisoptera | 235         | 11.6     | Xiaheyuan, Ningxia        | Namurian B-C         | (28) |

Oxygen is from refs. 29 and 30 (COPSE model, given as a ratio relative to modern  $pO_2$ ). The number of measured specimens per bin is indicated in column "*n*." The paleolatitude (paleolat) of each locality was calculated using PointTracker (31). The ordinal placement of some Paleozoic-Triassic Odonatopterans (Odonata + Meganisoptera) is approximate because of the complex phylogeny of these stem-group taxa (18, 32).

- Zhang J (1989) Fossil Insects from Shanwang, Shandong (Shandong Science and Technology Publishing House, Jinan, China) (Chinese).
- Prokop J, Nel A (2000) *Merlax bohemicus* gen. n., sp. n., a new fossil dragonfly from the lower Miocene of northern Bohemia (Odonata: Aeshnidae). *Eur J Entomol* 97:427-431.
- Zeuner FE (1943) The fossil Acrididae (Orth. Salt.) Part IV *Acrididae incertae sedis* and addendum to Catantopinae. *Ann Mag Nat Hist* 11:359-383.
- Campion H (1916) *Triaeschna gossi*, a new genus and species of Odonata from the Eocene of Bournemouth. *Annals and Magazine of Natural History, Series 8* 18:229-234.
- Henriksen KL (1929) A new Eocene grasshopper *Tettigonia* (*Locusta*) *amoena* n. sp. from Denmark. *Meddelelser fra Dansk Geologisk Forening* 7:317-320.
- Zeuner FE (1939) *Fossil Orthoptera Ensifera* (British Museum of Natural History, London), p 321.
- Cifuentes-Ruiz P, et al. (2006) Campanian terrestrial arthropods from the Cerro del Pueblo Formation, Difunta Group in northeastern Mexico. *Geological Carpathica* 57:347-354.
- Handlirsch A (1906) A new blattoid from the Cretaceous formation of North America. *Proceedings of the United States National Museum* 29:655-656.
- Bechly G, et al. (2001) A revision and phylogenetic study of Mesozoic Aeshnoptera, with description of numerous new taxa (Insecta: Odonata: Anisoptera). *Neue Paläontologische Abhandlungen* 4:1-219.



10. Rehn JWH (1939) The genus *Ptiloteuthis* Gabb. *Notulae Naturae of the Academy of Natural Sciences, Philadelphia* 9:1–2.
11. Menon F, Heads SW, Szewo J (2007) Cicadomorpha: Cicadas and relatives. *The Crato Fossil Beds of Brazil: Window into an Ancient World*, eds Martill DM, Bechly G, Loveridge RF (Cambridge Univ Press, Cambridge), pp 283–296.
12. Fleck G, Nel A (2003) Revision of the Mesozoic family Aeschniidae (Odonata: Anisoptera). *Zoologica* 153:1–170.
13. Barthel KW, Swinburne NHM, Conway Morris S (1994) *Solnhofen, a Study in Mesozoic Palaeontology* (Cambridge Univ Press, Cambridge).
14. Handlirsch A (1907) Die fossilen insekten und die phylogenie der rezenten formen [Fossil insects and the phylogeny of extant forms, parts V–VII]. *Ein Handbuch fur Palaontologen und Zoologen*. (Wilhelm Engelmann, Leipzig, Germany), pp. 641–1120 (German).
15. Nel A, Bechly G, Delclòs X, Huang DY (2009) New and poorly known Mesozoic damsel-dragonflies (Odonata: Isophlebiidae: Campterochlebiidae, Isophlebiidae). *Palaeodiversity* 2: 209–232.
16. Pritykina LN (1970) Triassic and Jurassic dragonflies of the Liassophlebiidae from Soviet central Asia. *Paleontological Journal* 4:91–102.
17. Bechly G (1997) New Fossil Odonates from the Upper Triassic of Italy, with a redescription of *Italophlebia gervasuttii* Whalley, and a reclassification of Triassic dragonflies. *Rivista del Museo Civico di Scienze Naturali Enrico Caffi* 19:31–70.
18. Nel A, Béthoux O, Bechly G, Martinez-Delclòs X, Papier F (2001) The Permo-Triassic Odonatoptera of the “Protodonate” grade (Insecta: Odonatoptera). *Ann Soc Entomol Fr* 37: 501–525.
19. Sharov AG (1968) Phylogeny of the Orthopteroidea insects. *Trudy Paleontologicheskogo Instituta. Akademii Nauk SSSR* 118:1–236.
20. Tillyard RJ (1925) A new fossil insect wing from Triassic beds near Deewhy, N.S.W. *Proc Linn Soc N S W* 50:374–377.
21. Laurentiaux-Vieira F, Ricour J, Laurentiaux D (1952) Un protodonate du trias de la Dent de Villard (Savoie) [A prodonate from the Triassic of Dent de Villard (Savoie)]. *Bull Soc Geol Fr* 6:319–325.
22. Martynov AB (1932) New Permian Palaeoptera with discussion of some problems of their evolution. *Trudy Paleontologicheskogo Instituta. Akademii Nauk SSSR* 1:1–47.
23. Nel A, et al. (2009) Revision of Permo-Carboniferous griffenflies (Insecta: Odonatoptera: Meganisoptera) based upon new species and redescription of selected poorly known taxa from Eurasia. *Palaeontographica Abteilung A-Paläozoologie-Stratigraphie* 289:89–121.
24. Carpenter FM (1939) The Lower Permian insects of Kansas. Part 8: Additional Megasecoptera, Protodonata, Odonata, Homoptera, Psocoptera, Protelytroptera, Plectoptera, and Protopleraria. *Proc Am Acad Arts Sci* 73:29–70.
25. Zessin W (2008) Überblick über die paläozoischen Libellen (Insecta, Odonatoptera) [Overview of Paleozoic dragonflies (Insecta, Odonatoptera)]. *Virgo. Mitteilungsblatt des Entomologischen Vereins Mecklenburg*, 11:5–32. German.
26. Carpenter FM (1943) Studies on Carboniferous insects from Commeny, France; Part I. Introduction and families Protagriidae, Meganeuridae, and Campylopteridae. *Geol Soc Am Bull* 54:527–554.
27. Prokop J, Nel A (2010) New griffenfly, *Bohemiatupus elegans* from the Late Carboniferous of western Bohemia in the Czech Republic (Odonatoptera: Meganisoptera: Meganeuridae). *Ann Soc Entomol Fr* 46:183–188.
28. Zhang ZJ, Hong YC, Lu LW, Fang XS, Jin YG (2006) *Shenzhousia qilianshanensis* gen. et sp. nov. (Protodonata, Meganeuridae), a giant dragonfly from the Upper Carboniferous of China. *Prog Nat Sci* 16:328–330.
29. Bergman N, Lenton T, Watson A (2004) COPSE: A new model of biogeochemical cycling over Phanerozoic time. *Am J Sci* 304:397–437.
30. Berner R (2009) Phanerozoic atmospheric oxygen: New results using the GEOCARBSULF model. *Am J Sci* 309:603–606.
31. Scotese C (2001) PointTracker v4c.
32. Nel A, Bechly G, Prokop J, Béthoux O, Fleck G (2012) Systematics and evolution of Paleozoic and Mesozoic damselfly-like Odonatoptera of the “Protozygopteran” grade. *J Paleontol* 86:81–104.

**Table S2. Estimated body width for the widest insect in each 10-Myr bin**

| Bin | Species name                         | Order         | Length (mm) | Width (mm) | Ref. |
|-----|--------------------------------------|---------------|-------------|------------|------|
| 10  | <i>Platycleis speciosa</i>           | Orthoptera    | 54          | 10.21      | (1)  |
| 20  | <i>Terpandrus ikiensis</i>           | Orthoptera    | 58          | 10.93      | (2)  |
| 30  | <i>“Orthacanthacris” lineata</i>     | Orthoptera    | 65          | 12.18      | (3)  |
| 40  | <i>Triaeschna gossi</i>              | Odonata       | 64          | 9.14       | (4)  |
| 50  | <i>Pseudotettigonia amoena</i>       | Orthoptera    | 63          | 11.82      | (5)  |
| 60  | <i>Arctolocusta gronlandica</i>      | Orthoptera    | 53          | 10.03      | (1)  |
| 90  | <i>Paraliupanshanian torvaldsi</i>   | Odonata       | 66.6        | 9.47       | (6)  |
| 100 | <i>Paraliupanshanian rohdendorfi</i> | Odonata       | 60.3        | 8.66       | (6)  |
| 110 | <i>Cratostenophlebia schwickerti</i> | Odonata       | 70          | 9.91       | (7)  |
| 120 | <i>Allaboilus hani</i>               | Orthoptera    | 60          | 11.28      | (8)  |
| 130 | <i>Pseudaboilus wealdensis</i>       | Orthoptera    | 75          | 13.96      | (9)  |
| 140 | <i>Procyrtophyllites britannicus</i> | Orthoptera    | 95          | 17.49      | (9)  |
| 150 | <i>Pycnophlebia robusta</i>          | Orthoptera    | 115         | 24.6       | (10) |
| 160 | <i>Cymatophlebia suevica</i>         | Odonata       | 110         | 14.87      | (6)  |
| 170 | <i>Scalpellaboilus angustus</i>      | Orthoptera    | 95          | 17.49      | (8)  |
| 180 | <i>Campterochlebia elegans</i>       | Odonata       | 73.1        | 10.3       | (11) |
| 190 | <i>Pteropteron mirabile</i>          | Odonata       | 94          | 12.91      | (12) |
| 200 | <i>Sogdophlebia singularis</i>       | Odonata       | 98.5        | 13.46      | (12) |
| 230 | <i>Gigatitan similis</i>             | Titanoptera   | 180         | 32.16      | (13) |
| 240 | <i>Clathrotitan scullyi</i>          | Titanoptera   | 145         | 26.17      | (14) |
| 250 | <i>Triadotypus guillaumei</i>        | Stem-Odonata  | 136         | 17.99      | (15) |
| 260 | <i>Kargalotypus kargalensis</i>      | Stem-Odonata  | 135         | 17.87      | (16) |
| 270 | <i>Arctotypus</i> sp. A              | Meganisoptera | 230         | 28.83      | (17) |
| 280 | <i>Meganeuroopsis permiana</i>       | Meganisoptera | 330         | 39.87      | (18) |
| 290 | Obora Specimen (large)               | Meganisoptera | 175         | 22.56      | (19) |
| 300 | <i>Meganeura monyi</i>               | Meganisoptera | 300         | 28         | (20) |
| 310 | <i>Bohemiatupus elegans</i>          | Meganisoptera | 260         | 32.18      | (21) |
| 320 | <i>Shenzhousia qilianshanensis</i>   | Meganisoptera | 235         | 29.39      | (22) |

Gray shaded rows indicate intervals where the specimen with the greatest estimated width differs from the specimen with the longest wing (in some cases because the longest wing belongs to a group where we cannot allometrically estimate body width). Numbers in red are actual measurements from the specimen.

- Zeuner FE (1939) *Fossil Orthoptera Ensifera* (British Museum of Natural History, London).
- Fujiyama I (1970) Fossil insects from the Chojabaru Formation, Iki Island, Japan. *Memoirs of the Natural Science Museum, Tokyo* 3:65–74.
- Zeuner FE (1943) The fossil Acrididae (Orth. Salt.) Part IV Acrididae incertae sedis and addendum to Catantopinae. *Ann Mag Nat Hist* 11:359–383.
- Campion H (1916) *Triaeschna gossi*, a new genus and species of Odonata from the Eocene of Bournemouth. *Annals and Magazine of Natural History, Series 8* 18:229–234.
- Henriksen KL (1929) A new Eocene grasshopper *Tettigonia (Locusta) amoena* n. sp. from Denmark. *Meddelelser fra Dansk Geologisk Forening* 7:317–320.
- Bechly G, et al. (2001) A revision and phylogenetic study of Mesozoic Aeshnoptera, with description of numerous new taxa (Insecta: Odonata: Anisoptera). *Neue Paläontologische Abhandlungen* 4:1–219.
- Bechly G (2010) Additions to the fossil dragonfly fauna from the Lower Cretaceous Crato Formation of Brazil (Insecta: Odonata). *Palaeodiversity* 3(Supplement):11–77.
- Gu JJ, Qiao GX, Ren D (2010) Revision and new taxa of fossil Prothalangopsidae (Orthoptera: Ensifera). *J Orthoptera Res* 19:41–56.
- Gorochov AV, Jarzembowski EA, Coram RA (2006) Grasshoppers and crickets (Insecta: Orthoptera) from the Lower Cretaceous of southern England. *Cretac Res* 27:641–662.
- Barthel KW, Swinburne NHM, Conway Morris S (1994) *Solnhofen, a Study in Mesozoic Palaeontology* (Cambridge Univ Press, Cambridge).
- Nel A, Bechly G, Delclòs X, Huang DY (2009) New and poorly known Mesozoic damselfly dragonflies (Odonata: Isophlebiidae: Campterochlebiidae, Isophlebiidae). *Palaeodiversity* 2: 209–232.
- Pritykina LN (1970) Triassic and Jurassic dragonflies of the Liassophlebiidae from Soviet central Asia. *Paleontological Journal* 4:91–102.
- Sharov AG (1968) Phylogeny of the Orthopteroidea insects. *Trudy Paleontologicheskogo Instituta. Akademii Nauk SSSR* 118:1–236.
- Tillyard RJ (1925) A new fossil insect wing from Triassic beds near Deewhy, N.S.W. *Proc Linn Soc N S W* 50:374–377.
- Laurentiaux-Vieira F, Ricour J, Laurentiaux D (1952) Un protodonate du trias de la Dent de Villard (Savoie) [A prodonate from the Triassic of Dent de Villard (Savoie)]. *Bull Soc Geol Fr*, 6:319–325. French.
- Martynov AB (1932) New Permian Palaeoptera with discussion of some problems of their evolution. *Trudy Paleontologicheskogo Instituta. Akademii Nauk SSSR* 1:1–47.
- Nel A, et al. (2009) Revision of Permo-Carboniferous griffenflies (Insecta: Odonatoptera: Meganisoptera) based upon new species and redescription of selected poorly known taxa from Eurasia. *Palaeontographica Abteilung A-Paläozoologie-Stratigraphie* 289:89–121.
- Carpenter FM (1939) The Lower Permian insects of Kansas. Part 8: Additional Megasecoptera, Protodonata, Odonata, Homoptera, Psocoptera, Protelytroptera, Plectoptera, and Protoperlaria. *Proc Am Acad Arts Sci* 73:29–70.
- Zessin W (2008) Überblick über die paläozoischen Libellen (Insecta, Odonatoptera) [Overview of Paleozoic dragonflies (Insecta, Odonatoptera)]. *Virgo Mitteilungsblatt des Entomologischen Vereins Mecklenburg*, 11:5–32. German.
- Carpenter FM (1943) Studies on Carboniferous insects from Commeny, France; Part I. Introduction and families Protagriidae, Meganeuridae, and Campylopteridae. *Geol Soc Am Bull* 54:527–554.
- Prokop J, Nel A (2010) New griffenfly, *Bohemiatupus elegans* from the Late Carboniferous of western Bohemia in the Czech Republic (Odonatoptera: Meganisoptera: Meganeuridae). *Ann Soc Entomol Fr* 46:183–188.
- Zhang ZJ, Hong YC, Lu LW, Fang XS, Jin YG (2006) *Shenzhousia qilianshanensis* gen. et sp. nov. (Protodonata, Meganeuridae), a giant dragonfly from the Upper Carboniferous of China. *Prog Nat Sci* 16:328–330.

**Table S3. Estimated body volumes for the largest insect in each 10-Myr bin**

| Bin | Species name                         | Order         | Length (mm) | Volume (mm <sup>3</sup> ) | Ref. |
|-----|--------------------------------------|---------------|-------------|---------------------------|------|
| 10  | <i>Mediaeschna lucida</i>            | Odonata       | 66.7        | 5,572                     | (1)  |
| 20  | <i>Merlax bohemicus</i>              | Odonata       | 66.5        | 5,527                     | (2)  |
| 30  | <i>“Orthacanthacris” lineata</i>     | Orthoptera    | 65          | 4,829                     | (3)  |
| 40  | <i>Triaeschna gossi</i>              | Odonata       | 64          | 4,992                     | (4)  |
| 50  | <i>Pseudotettigonia amoena</i>       | Orthoptera    | 63          | 4,453                     | (5)  |
| 60  | <i>Arctolocusta groenlandica</i>     | Odonata       | 53          | 2,845                     | (6)  |
| 90  | <i>Paraliupanshania torvaldsi</i>    | Odonata       | 66.6        | 5,550                     | (7)  |
| 100 | <i>Paraliupanshania rohdendorfi</i>  | Odonata       | 60.3        | 4,260                     | (7)  |
| 110 | <i>Cratostenophlebia schwickerti</i> | Odonata       | 70          | 6,336                     | (8)  |
| 120 | <i>Sinaeschnidia cancellosa</i>      | Odonata       | 75          | 7,613                     | (9)  |
| 130 | <i>Gigantoaeschnidium ibericus</i>   | Odonata       | 80          | 9,039                     | (9)  |
| 140 | <i>Prohoyaeschna milleri</i>         | Odonata       | 97          | 15,094                    | (7)  |
| 150 | <i>Pycnophlebia robusta</i>          | Orthoptera    | 115         | 21,203                    | (10) |
| 160 | <i>Cymatophlebia suevica</i>         | Odonata       | 110         | 21,093                    | (7)  |
| 170 | <i>Hemerobioides giganteus</i>       | Odonata       | 120         | 26,589                    | (11) |
| 180 | <i>Campterochlebia elegans</i>       | Odonata       | 73.1        | 7,110                     | (12) |
| 190 | <i>Pteropteron mirabile</i>          | Odonata       | 94          | 13,883                    | (13) |
| 200 | <i>Sogdophlebia singularis</i>       | Odonata       | 98.5        | 15,723                    | (13) |
| 230 | <i>Gigatitan similis</i>             | Titanoptera   | 180         | 67,752                    | (14) |
| 240 | <i>Clathrotitan scullyi</i>          | Titanoptera   | 145         | 38,675                    | (15) |
| 250 | <i>Triadotypus guillaumei</i>        | Stem-Odonata  | 136         | 37,098                    | (16) |
| 260 | <i>Kargalotypus kargalensis</i>      | Stem-Odonata  | 135         | 36,376                    | (17) |
| 270 | <i>Arctotypus sp. A</i>              | Meganisoptera | 230         | 150,161                   | (18) |
| 280 | <i>Meganeuropsis permiana</i>        | Meganisoptera | 330         | 392,433                   | (19) |
| 290 | <i>Obora Specimen (large)</i>        | Meganisoptera | 175         | 72,564                    | (20) |
| 300 | <i>Meganeura monyi</i>               | Meganisoptera | 300         | 304,523                   | (21) |
| 310 | <i>Bohemiatupus elegans</i>          | Meganisoptera | 260         | 208,087                   | (22) |
| 320 | <i>Shenzhousia qilianshanensis</i>   | Meganisoptera | 235         | 159,005                   | (23) |

Gray shaded rows indicate intervals where the specimen with a greater estimated volume differs from the specimen with the longest wing.

- Zhang J (1989) *Fossil Insects from Shanwang, Shandong* (Shandong Science and Technology Publishing House, Jinan, China), (Chinese).
- Prokop J, Nel A (2000) *Merlax bohemicus* gen. n., sp. n., a new fossil dragonfly from the lower Miocene of northern Bohemia (Odonata: Aeshnidae). *Eur J Entomol* 97:427–431.
- Zeuner FE (1943) The fossil Acrididae (Orth. Salt.) Part IV Acrididae incertae sedis and addendum to Catantopinae. *Ann Mag Nat Hist* 11:359–383.
- Campion H (1916) *Triaeschna gossi*, a new genus and species of Odonata from the Eocene of Bournemouth. *Annals and Magazine of Natural History, Series 8* 18:229–234.
- Henriksen KL (1929) A new Eocene grasshopper *Tettigonia (Locusta) amoena* n. sp. from Denmark. *Meddelelser fra Dansk Geologisk Forening* 7:317–320.
- Zeuner FE (1939) *Fossil Orthoptera Ensifera* (British Museum of Natural History, London), p 321.

7. Bechly G, et al. (2001) A revision and phylogenetic study of Mesozoic Aeshnoptera, with description of numerous new taxa (Insecta: Odonata: Anisoptera). *Neue Paläontologische Abhandlungen* 4:1–219.
8. Bechly G (2010) Additions to the fossil dragonfly fauna from the Lower Cretaceous Crato Formation of Brazil (Insecta: Odonata). *Palaeodiversity* 3(Supplement):11–77.
9. Fleck G, Nel A (2003) Revision of the Mesozoic family Aeschnidiidae (Odonata: Anisoptera). *Zoologica* 153:1–170.
10. Barthel KW, Swinburne NHM, Conway Morris S (1994) *Solnhofen, a Study in Mesozoic Palaeontology* (Cambridge Univ Press, Cambridge).
11. Handlirsch A (1907) Die fossilen Insekten und die Phylogenie der rezenten Formen [Fossil insects and the phylogeny of extant forms, parts V–VII]. *Ein Handbuch für Paläontologen und Zoologen* (Wilhelm Engelmann, Leipzig, Germany), pp 641–1120. German.
12. Nel A, Bechly G, Delclòs X, Huang DY (2009) New and poorly known Mesozoic damselfly dragonflies (Odonata: Isophlebiidae: Campterochlebiidae, Isophlebiidae). *Palaeodiversity* 2: 209–232.
13. Pritykina LN (1970) Triassic and Jurassic dragonflies of the Liassophlebiidae from Soviet central Asia. *Paleontological Journal* 4:91–102.
14. Sharov AG (1968) Phylogeny of the Orthopteroidea insects. *Trudy Paleontologicheskogo Instituta Akademii Nauk SSSR* 118:1–236.
15. Tillyard RJ (1925) A new fossil insect wing from Triassic beds near Deewhy, N.S.W. *Proc Linn Soc N S W* 50:374–377.
16. Laurentiaux-Vieira F, Ricour J, Laurentiaux D (1952) Un protodonate du trias de la Dent de Villard (Savoie) [A prodonate from the Triassic of Dent de Villard (Savoie)]. *Bull Soc Geol Fr*, 6:319–325. French.
17. Martynov AB (1932) New Permian Palaeoptera with discussion of some problems of their evolution. *Trudy Paleontologicheskogo Instituta Akademii Nauk SSSR* 1:1–47.
18. Nel A, et al. (2009) Revision of Permo-Carboniferous griffenflies (Insecta: Odonatoptera: Meganisoptera) based upon new species and redescription of selected poorly known taxa from Eurasia. *Palaeontographica Abteilung A-Paläozoologie-Stratigraphie* 289:89–121.
19. Carpenter FM (1939) The Lower Permian insects of Kansas. Part 8: Additional Megasecoptera, Protodonata, Odonata, Homoptera, Psocoptera, Protelytroptera, Plectoptera, and Protoperlaria. *Proc Am Acad Arts Sci* 73:29–70.
20. Zessin W (2008) Overview of Paleozoic dragonflies (Insecta, Odonatoptera) (Translated from German). *Virgo Mitteilungsblatt des Entomologischen Vereins Mecklenburg* 11:5–32.
21. Carpenter FM (1943) Studies on Carboniferous insects from Commeny, France; Part I. Introduction and families Protagriidae, Meganeuridae, and Campylopteridae. *Geol Soc Am Bull* 54:527–554.
22. Prokop J, Nel A (2010) New griffenfly, *Bohemiatopus elegans* from the Late Carboniferous of western Bohemia in the Czech Republic (Odonatoptera: Meganisoptera: Meganeuridae). *Ann Soc Entomol Fr* 46:183–188.
23. Zhang ZJ, Hong YC, Lu LW, Fang XS, Jin YG (2006) *Shenzhousia qilianshanensis* gen. et sp. nov. (Protodonata, Meganeuridae), a giant dragonfly from the Upper Carboniferous of China. *Prog Nat Sci* 16:328–330.

**Table S4. Maximum-likelihood model support for the four basic models (1–4) explained above using body width, body volume, and the alternative COPSE model for Phanerozoic pO<sub>2</sub>, ordered from best-supported to least by  $\Delta$ AICc**

| Model | Berner (2)/body width |           | Berner/body volume |           | COPSE (1)/wing length |           | COPSE/body width |           | COPSE/body volume |           |
|-------|-----------------------|-----------|--------------------|-----------|-----------------------|-----------|------------------|-----------|-------------------|-----------|
|       | $\Delta$ AICc         | Akaike wt | $\Delta$ AICc      | Akaike wt | $\Delta$ AICc         | Akaike wt | $\Delta$ AICc    | Akaike wt | $\Delta$ AICc     | Akaike wt |
| 1     | 608.3                 | <0.001    | 561.5              | <0.001    | 437.4                 | <0.001    | 419.0            | <0.001    | 389.0             | <0.001    |
| 2     | 0.0                   | 0.767     | 2.0                | 0.192     | 16.0                  | <0.001    | 0.1              | 0.449     | 13.9              | <0.001    |
| 3     | 3.2                   | 0.152     | 1.3                | 0.279     | 8.8                   | 0.012     | 3.3              | 0.089     | 13.2              | 0.001     |
| 4     | 4.5                   | 0.081     | 0.0                | 0.529     | 0.0                   | 0.988     | 0.0              | 0.462     | 0.0               | 0.998     |

Proportional model support is indicated by the Akaike weights (wt); the best-supported model is shown in red.
